# Supplementary material for: SRP14 Triggers Apoptosis in Renal Tubules to Exacerbate AKI Through an Interaction with RPS7
Source: Research Square preprint supplement (doi:10.21203/rs.3.rs-7892365/v1), 2025-11-12
Supplement: Supplementary file 1 [file d241f2fde9a20a6fe1ea2868.docx]

**Structured Methods - Reagents and Tools Table**

*Instructions: Please complete the relevant fields below, adding rows as needed. The following page provides an example of a completed table and additional instruction for entering your data in the table.*

| **Reagent/Resource** | **Reference or Source** | **Identifier or Catalog Number** |
| --- | --- | --- |
| Lipopolysaccharide | Sigma-Aldrich | L2630 |
| Lysis buffer | Beyotime | P0013B |
| Immobilon Western Chemilum HRP Substrate | Millipore/Merck | WBKLS-638173 |
| Cisplatin | Sigma-Aldrich | 479306 |
| DMEM/F-12 | Gibco | C11330500BT |
| Fetal bovine serum | Gibco | 10099-141c |
| Lipofectamine 3000 Transfection Reagent | Thermo fihser | L3000015 |
| Hematoxylin and eosin staining kit | Baso | SC231202 |
| Periodic acid-Schiff staining kit | Baso | SC241001 |
| Opal 4-Color Manual IHC Staining Kits | Akoya bioscience | FP1487001KT, FP1488001KT, FP1495001KT |
| DeadEnd Fluorometric TUNEL System | Promega | G3250 |
| Annexin V Alexa Fluor 488 & Propidium Iodide Cell Apoptosis Detection Kit | Dojindo Laboratories | AD11 |
| G-MM-IGT Biotinylation Kit | Genemore | G-MM-IGT |
| SRP14 ELISA kit | Zhuochai biology | ZC-54503 |
| Creatine assay kit | Nanjing Jiancheng Biotech. | C011-2 |
| Urea nitrogen assay kit | Nanjing Jiancheng Biotech. | C013-2 |
| **Experimental Models** |  |  |
| C57BL/6 mice | Chengdu Dossy Experimental Animals Co., Ltd | n/a |
| Tubule-specific Srp14 knockout mice | Cyagen Biosciences | CKOCMP-20813-Srp14-B6N-VA |
| Ggt-Cre transgenic mice | Jackson Laboratory | 012841 |
| **Recombinant DNA** |  |  |
| pAAV[shRNA]-EGFP:T2A:Puro-U6>{mSrp14[shRNA]} | VectorBuilder Inc. | n/a |
| pAAV[Exp]-CMV>HA/hRPS7[NM_001011.4](ns):T2A:EGFP | VectorBuilder Inc. | n/a |
| **Antibodies** |  |  |
| Antibody against SRP14 | Novus | NBP2-94184 |
| Antibody against RPS7 | Santa Cruz | SC-100834 |
| Horseradish peroxidase labeled secondary antibody | Dako | K5007 |
| Antibody against Kim-1 | Novus | NBP-43761 |
| Antibody against SRP14 | Santa Cruz | SC-377012 |
| Antibody against β-actin | Proteintech | 6008 |
| Antibody against RPS7 | Invitrogen | PA5-77005 |
| Antibody against Bax | Abcam | ab182733 |
| Antibody against cleaved caspase 3 | Cell Signaling Technology | 9664s |
| Antibody against p53 | Abcam | ab131442 |
| Antibody against MDM2 | Abcam | ab259265 |
| HRP-conjugated goat anti-rabbit antibody | ZenBio | 511203 |
| HRP-conjugated goat anti-mouse antibody | ZenBio | 511103 |
| **Oligonucleotides and other sequence-based reagents** |  |  |
| SRP14 siRNA | RIBOBIO | SIGS0008000-4 |
| RPS7 siRNA | RIBOBIO | SIGS0001928-4 |
| **Chemicals, Enzymes and other reagents** |  |  |
| Protease inhibitor | Beyotime | ST506-2 |
| Trelief mouse direct PCR kit | Tsingke | TSE014 |
| The apoptosis compound library | Selleck | Cherry Pick Library(96-well)-L2000-Z439858 |
| Nafamostat mesylate | Sellerck | S1386 |
| Tretinoin | Sellerck | S1653 |
| **Software** |  |  |
| SPSS software | IBM Corporation | Windows version 29.0 |
| GraphPad Software | GraphPad Software | GraphPad Prism version 8.0.1 |
| **Other** |  |  |
| Artery clamps | Roboz | RS-5420 |
| Cell hypoxia/hyperoxia workstation | Gene Science | MiniStation Plus-MPS230418047 |
| Confocal microscope | ZEISS | LSM900 |
| Chemiluminescence image analysis system | Tanon | 5200 |
| Fortebio | Pall Life Sciences | Octet K2 |
| Polyvinylidene fluoride membrane | Merck Millipore | ISEQ00010 |
